# Supplementary material for: High-Volume Hospital Had Lower Mortality of Severe Intracerebral Hemorrhage Patients
Source: PubMed Central journal article supplement — J Korean Neurosurg Soc. 2024 Mar 4;67(6):622–36. doi: 10.3340/jkns.2023.0205 (PMC11540523; doi:10.3340/jkns.2023.0205), 2024-03-04
Supplement: jkns-2023-0205-Supplementary-Table-1.pdf [file jkns-2023-0205-Supplementary-Table-1.pdf]

**Supplementary Table 1.** Cox analysis of death according to total 9086 intracerebral hemorrhage patients for 4 years

|                       | 3-month                       |             | 1-year                        |             | 2-year                        |             | 4-year                        |             |
|-----------------------|-------------------------------|-------------|-------------------------------|-------------|-------------------------------|-------------|-------------------------------|-------------|
|                       | Mild                          | Severe      | Mild                          | Severe      | Mild                          | Severe      | Mild                          | Severe      |
|                       | HR (95% CI)                   | HR (95% CI) |
| Medical facility type |                               |             |                               |             |                               |             |                               |             |
| Low-volume hospital   | 1                             |             | 1                             |             | 1                             |             | 1                             |             |
| High-volume hospital  | 0.90 (0.83–0.98)*             | 0.0121      | 0.89 (0.82–0.97) <sup>†</sup> | 0.0046      | 0.97 (0.89–1.05)              | 0.3754      | 0.89 (0.81–0.98)*             | 0.0181      |
| Surgery type          |                               |             |                               |             |                               |             |                               |             |
| No surgery            | 1                             |             | 1                             |             | 1                             |             | 1                             |             |
| Surgery               | 1.30 (1.18–1.42) <sup>‡</sup> | <0.0001     | 1.49 (1.36–1.63) <sup>‡</sup> | <0.0001     | 1.61 (1.47–1.77) <sup>‡</sup> | <0.0001     | 1.59 (1.42–1.78) <sup>‡</sup> | <0.0001     |
| Severity              |                               |             |                               |             |                               |             |                               |             |
| Mild                  | 1                             |             | 1                             |             | 1                             |             | 1                             |             |
| Severe                | 2.05 (1.88–2.23) <sup>‡</sup> | <0.0001     | 1.91 (1.76–2.07) <sup>‡</sup> | <0.0001     | 1.98 (1.83–2.15) <sup>‡</sup> | <0.0001     | 2.35 (2.14–2.58) <sup>‡</sup> | <0.0001     |
| Age                   |                               |             |                               |             |                               |             |                               |             |
| 18–45 years           | 1                             |             | 1                             |             | 1                             |             | 1                             |             |
| 46–59 years           | 1.39 (1.16–1.66) <sup>‡</sup> | 0.0004      | 1.25 (1.04–1.50)*             | 0.0162      | 1.20 (1.00–1.44)              | 0.0504      | 0.96 (0.77–1.19)              | 0.7044      |
| 60–69 years           | 1.86 (1.55–2.23) <sup>‡</sup> | <0.0001     | 1.63 (1.35–1.95) <sup>‡</sup> | <0.0001     | 1.38 (1.15–1.44) <sup>‡</sup> | 0.0006      | 0.94 (0.75–1.17)              | 0.5499      |
| ≥70 years             | 3.33 (2.81–3.96) <sup>‡</sup> | <0.0001     | 2.33 (1.96–2.77) <sup>‡</sup> | <0.0001     | 1.67 (1.41–1.99) <sup>‡</sup> | <0.0001     | 1.11 (0.91–1.37)              | 0.3134      |
| Gender                |                               |             |                               |             |                               |             |                               |             |
| Male                  | 1                             |             | 1                             |             | 1                             |             | 1                             |             |
| Female                | 0.83 (0.78–0.90) <sup>‡</sup> | <0.0001     | 0.89 (0.83–0.96) <sup>‡</sup> | 0.0025      | 1.00 (0.93–1.08)              | 0.9701      | 0.96 (0.88–1.05)              | 0.3831      |
| Arrival mode          |                               |             |                               |             |                               |             |                               |             |
| EMS                   | 1                             |             | 1                             |             | 1                             |             | 1                             |             |
| No EMS                | 0.81 (0.73–0.90) <sup>‡</sup> | <0.0001     | 0.85 (0.77–0.94) <sup>‡</sup> | 0.0017      | 0.85 (0.77–0.94) <sup>‡</sup> | 0.0011      | 0.86 (0.77–0.97)*             | 0.0142      |
| Medical history       |                               |             |                               |             |                               |             |                               |             |
| CCI score             |                               |             |                               |             |                               |             |                               |             |
| 0                     | 1                             |             | 1                             |             | 1                             |             | 1                             |             |
| 1                     | 0.97 (0.86–1.09)              | 0.6382      | 0.90 (0.80–1.02)              | 0.0947      | 1.06 (0.94–1.20)              | 0.3143      | 0.99 (0.86–1.15)              | 0.9353      |
| 2                     | 0.85 (0.75–0.96) <sup>‡</sup> | 0.0068      | 0.75 (0.67–0.85) <sup>‡</sup> | <0.0001     | 0.82 (0.73–0.92) <sup>‡</sup> | 0.0011      | 0.83 (0.72–0.96)*             | 0.0127      |
| ≥3                    | 0.93 (0.85–1.03)              | 0.1734      | 0.68 (0.61–0.75) <sup>‡</sup> | <0.0001     | 0.67 (0.61–0.74) <sup>‡</sup> | <0.0001     | 0.62 (0.55–0.70) <sup>‡</sup> | <0.0001     |

Mild severity = NIHSS ≤15, GCS ≥10; severe severity = NIHSS ≥16, GCS ≤9. \**p*<0.05 significance. <sup>†</sup>*p*<0.01 significance. <sup>‡</sup>*p*<0.001 significance. HR : hazard ratio, CI : confidence interval, EMS : emergency medical services, CCI : Charlson comorbidity index, NIHSS : National Institutes of Health Stroke Scale, GCS : Glasgow coma scale
