# Supplementary material for: High-Volume Hospital Had Lower Mortality of Severe Intracerebral Hemorrhage Patients
Source: PubMed Central journal article supplement — J Korean Neurosurg Soc. 2024 Mar 4;67(6):622–36. doi: 10.3340/jkns.2023.0205 (PMC11540523; doi:10.3340/jkns.2023.0205), 2024-03-04
Supplement: jkns-2023-0205-Supplementary-Table-2.pdf [file jkns-2023-0205-Supplementary-Table-2.pdf]

**Supplementary Table 2.** Hospital costs according to hospital volume and surgical treatment of intracerebral hemorrhage patients

|                       | Number of patients | Cost*                 | p-value |
|-----------------------|--------------------|-----------------------|---------|
| Total                 | 4941               | \$10650.01±\$16713.25 |         |
| Low-volume hospitals  | 1342               | \$9768.82±\$16259.93  | 0.0288  |
| High-volume hospitals | 3599               | \$10967.41±\$16870.39 |         |
| No surgery            | 3938               | \$8628.35±\$15036.66  | <0.001  |
| Surgery               | 1003               | \$18587.50±\$20239.47 |         |

Values are presented as mean±standard deviation or number. \*The cost was calculated on the Korean Won (₩) and then converted to the United States dollar (\$) using an exchange rate of \$1 = ₩808 according to the Purchasing Power Parities of 2022 on the OECD
